# Supplementary material for: Chronic pharmacologic manipulation of dopamine transmission ameliorates metabolic disturbance in Trappc9-linked brain developmental syndrome
Source: JCI journal article supplement (doi:10.1172/jci.insight.181339), 2024-06-18
Supplement: sd1 [file 1]

## Supplementary figures and figure legends

Figure S1

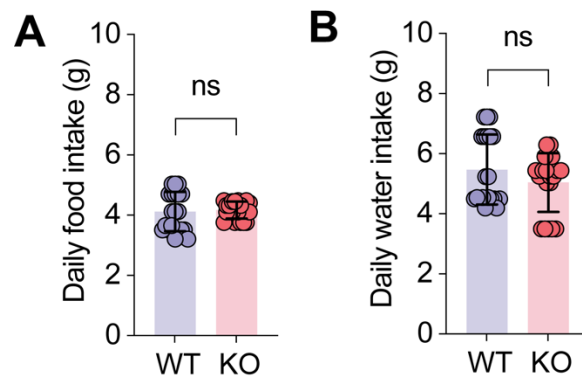

**Figure S1 The abrogation of *trappc9* in mice does not alter water and food intake.**

Daily food (**A**) and water (**B**) intake of WT and *trappc9* mice were measured for one week at age 5 months (N=12 mice per genotype). Each symbol in bar graphs represents one mouse. Data are Mean $\pm$ SD. Two-tailed Student's t-test: ns, no significance.

**Figure S2**

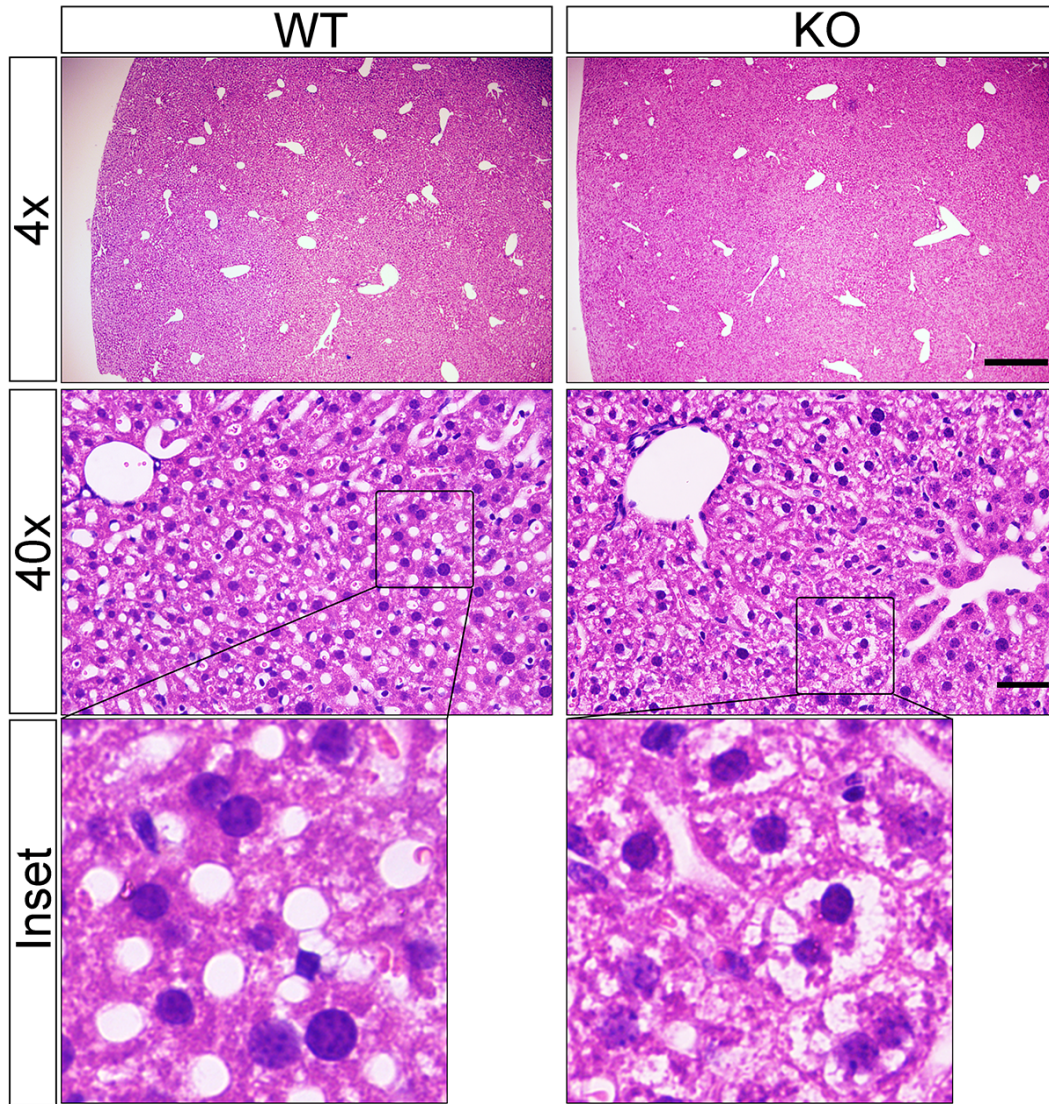

**Figure S2 Apparent hepatocyte vacuolation with no infiltration of inflammatory cells in the liver of trappc9 KO mice.** Liver sections of trappc9 KO and WT mice were processed for hematoxylin and eosin staining. The age was 3-5 months old. Images were captured with a CCD camera on an Olympus BX53 microscope. Scale bars: 1000  $\mu\text{m}$  and 200  $\mu\text{m}$  for images taken with a 4x objective and a 40x objective, respectively.

**Figure S3**

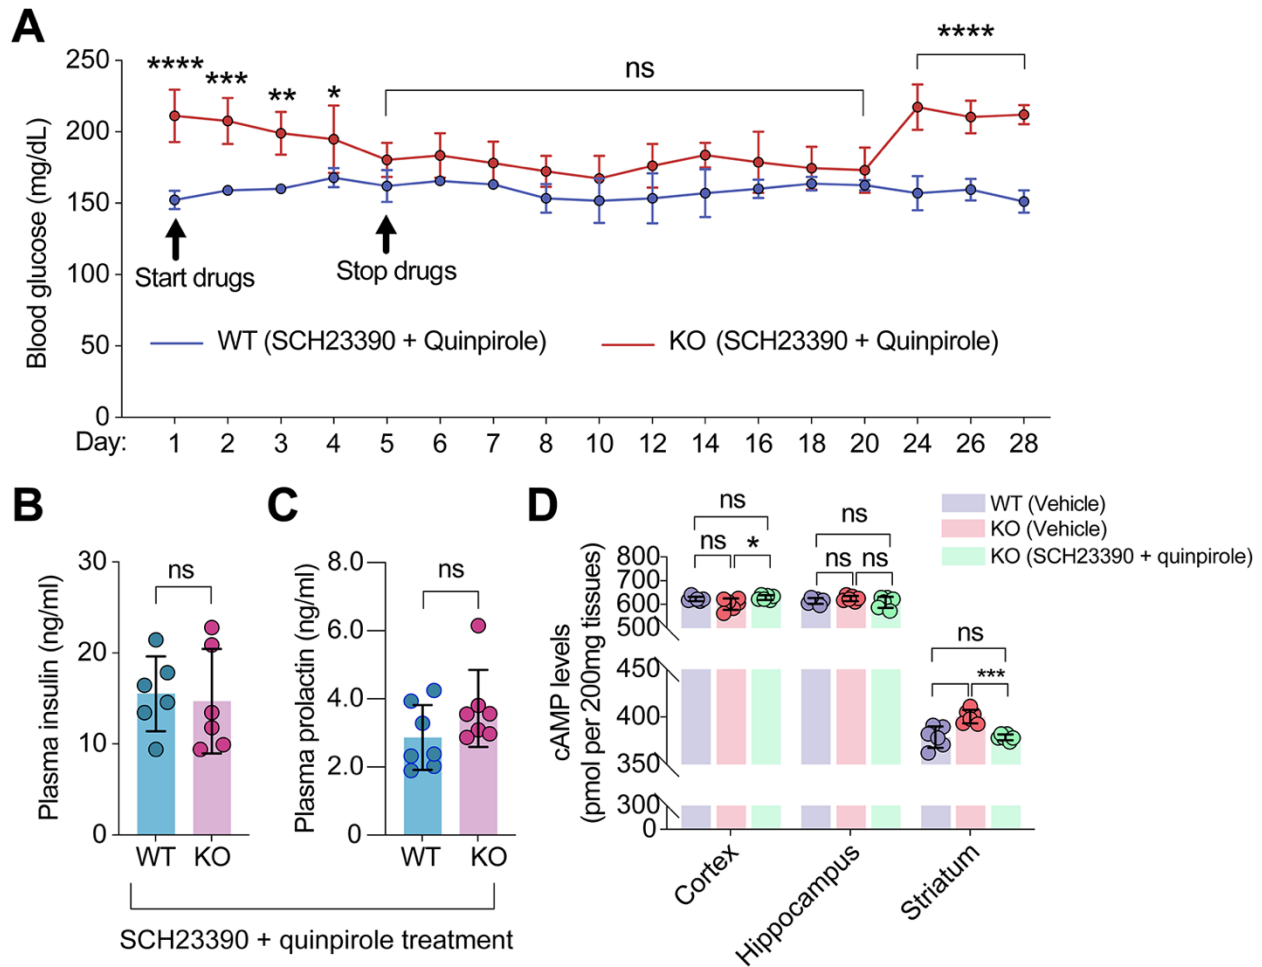

**Figure S3** The combined treatment with SCH23390 and quinpirole restores the homeostasis of systemic glucose, insulin and prolactin, and signs of their actions in the brain. **A)** Efficacy of the SCH23390 and quinpirole combination in lowering blood glucose in trappc9 KO mice. The plot shows that daily administration of both drugs had a trivial effect on blood glucose levels in WT mice, but effectively decreased blood glucose levels in trappc9 KO mice 5 days after treatment. Drug effects lasted for two weeks after the treatment was stopped. Efficacy of the combined treatment in correcting

hyperinsulinemia (**B**) and hyperprolactinemia (**C**) in *trappc9* KO mice. **D**) Effects of the treatment combining SCH23390 and quinpirole on cAMP levels in the indicated brain areas. Efficacy studies in (**A**) were done with a cohort of 7 mice for each genotype. Each symbol in bar graphs represents one mouse. Data are Mean $\pm$ SD. Statistical significance was determined by two-tailed Student's t-test (**A**, **B**, **C**) or one-way ANOVA and post hoc Tukey's test (**D**): \* P<0.05; \*\* P<0.01; \*\*\* P<0.005; \*\*\*\* P<0.001; ns, no significance.
