# Supplementary material for: Chronic pharmacologic manipulation of dopamine transmission ameliorates metabolic disturbance in Trappc9-linked brain developmental syndrome
Source: JCI journal article supplement (doi:10.1172/jci.insight.181339), 2024-06-18

Full unedited gel for Figure 5H

Anti-TH

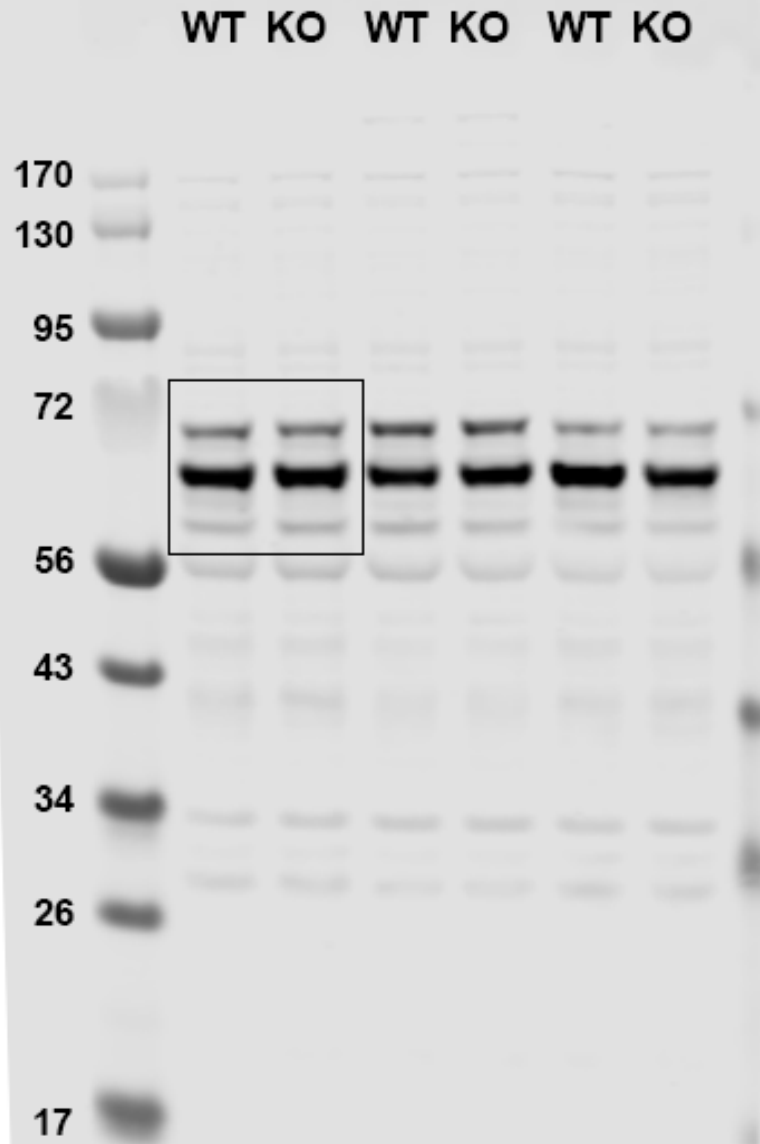

Full unedited gel for Figure 5H

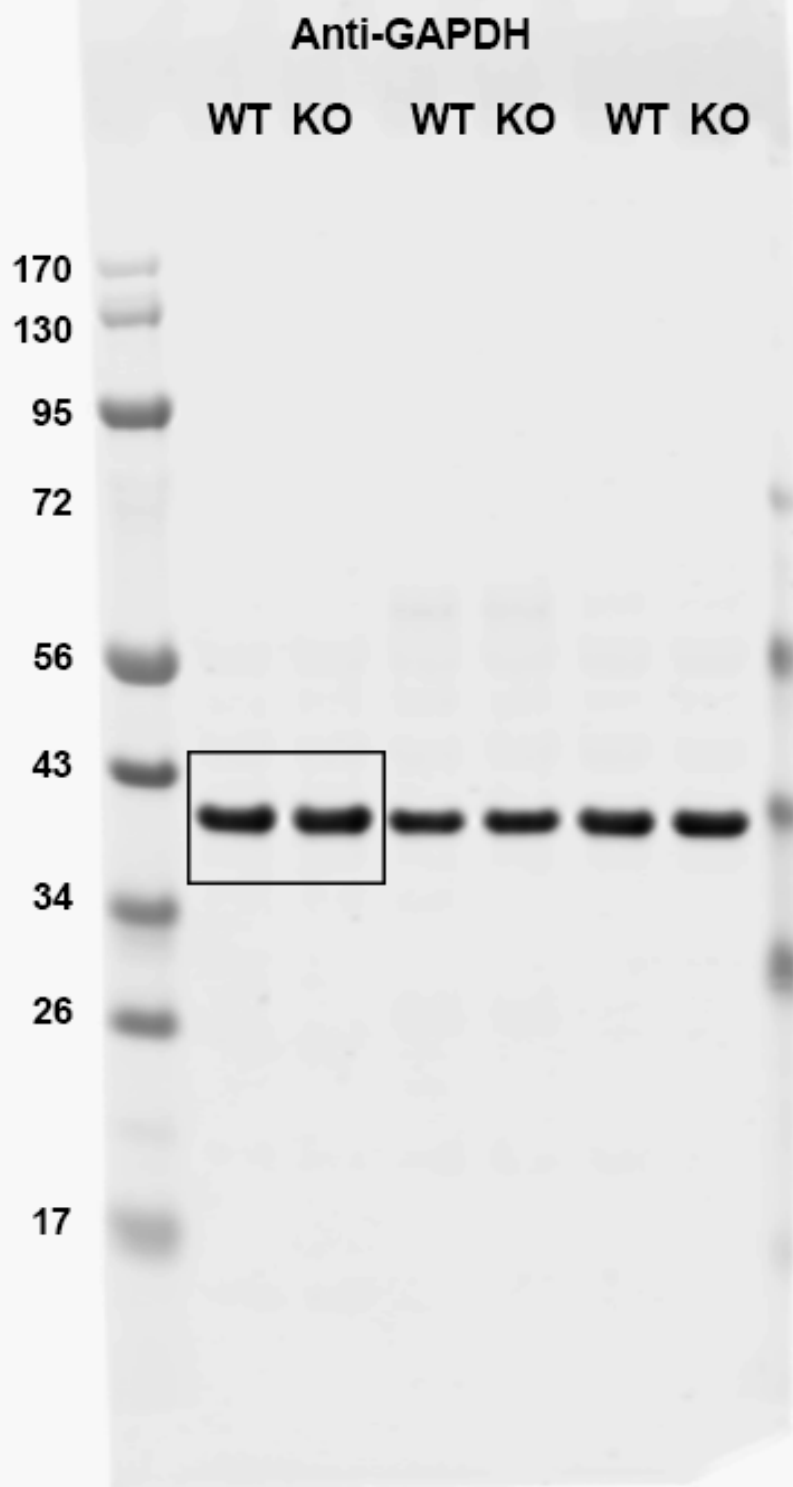

**Full unedited gel for Figure6D Anti-Trappc9**

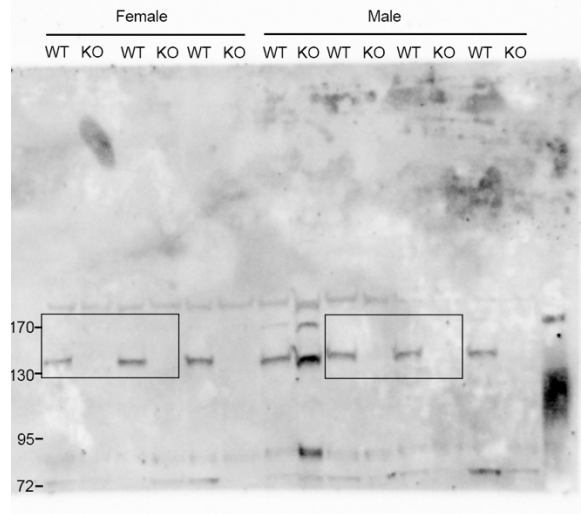

**Full unedited gel for Figure6D Anti-Unc13c**

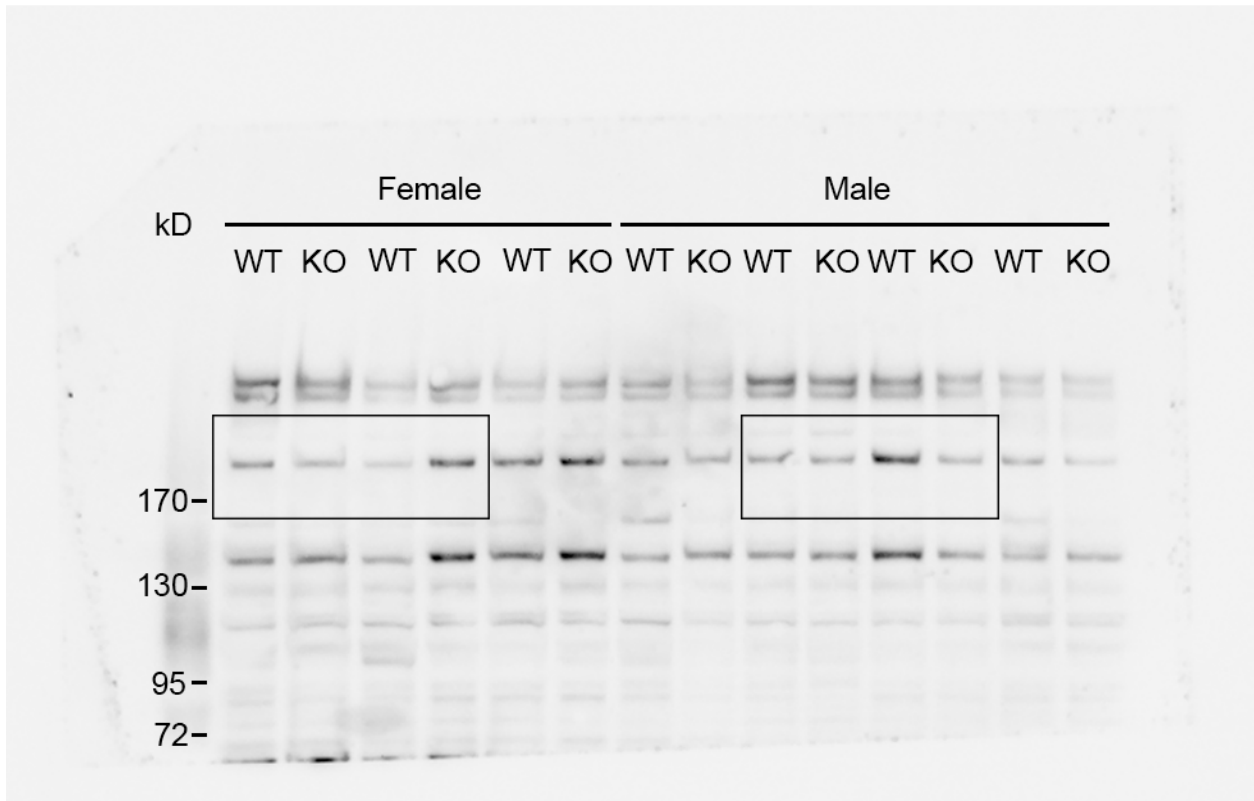





### Full unedited gel for Figure6D Anti-Gpm6a

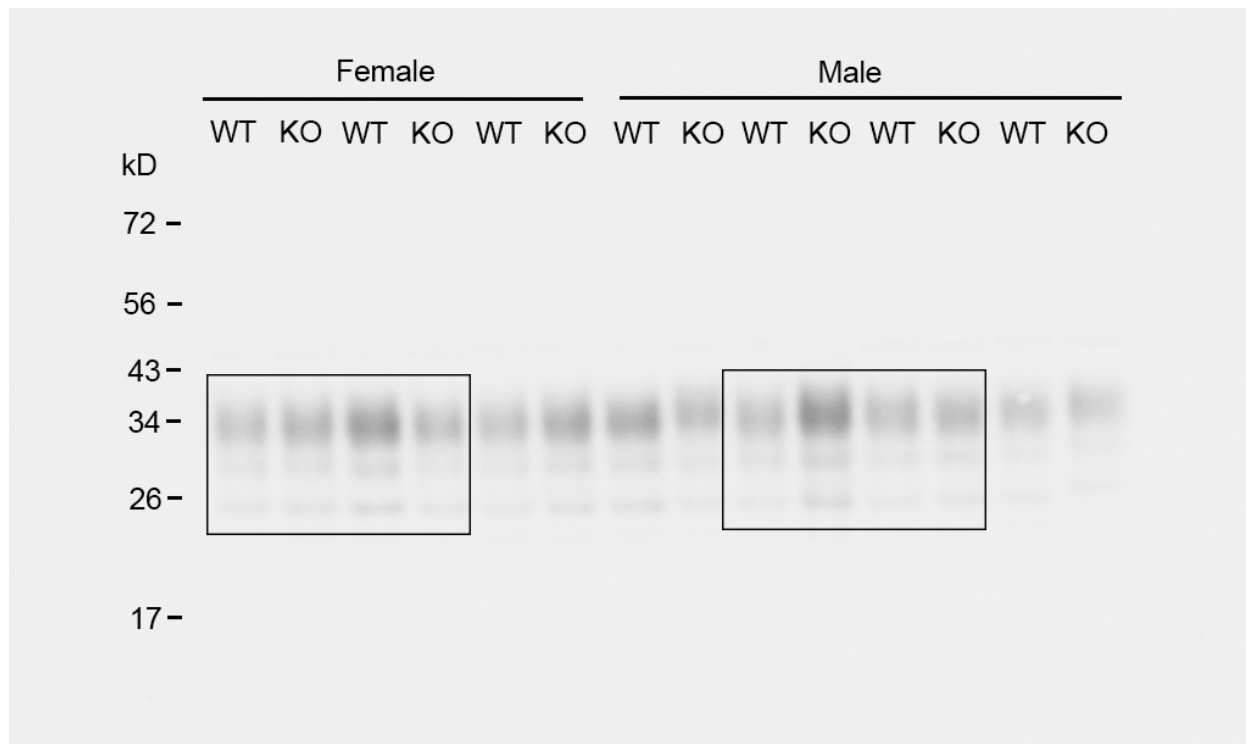

### Full unedited gel for Figure6D Anti-Insyn1

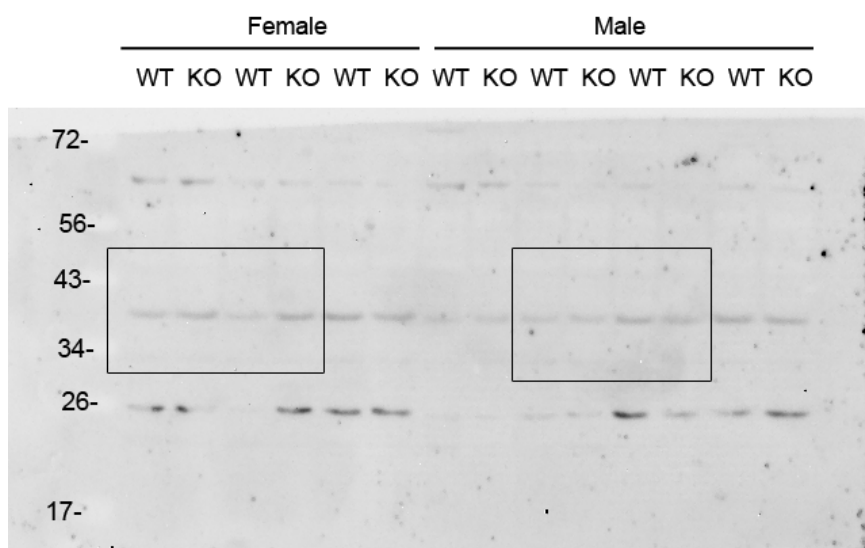

**Full unedited gel for Figure6D Anti-GAPDH**

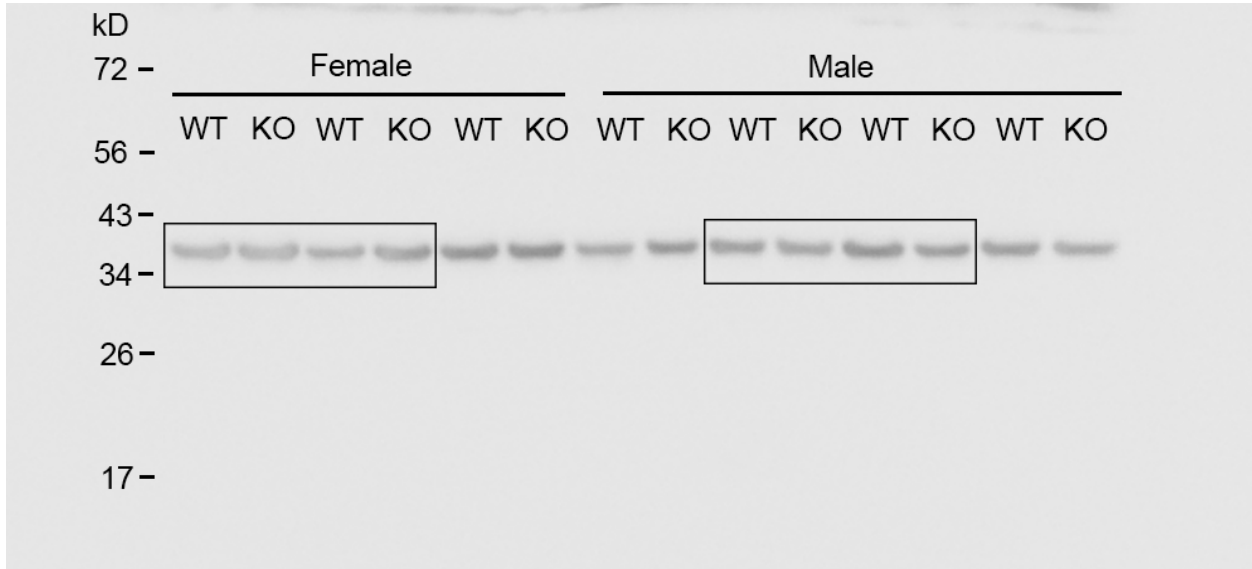

**Full unedited gel for Figure6G Anti-Unc13c**

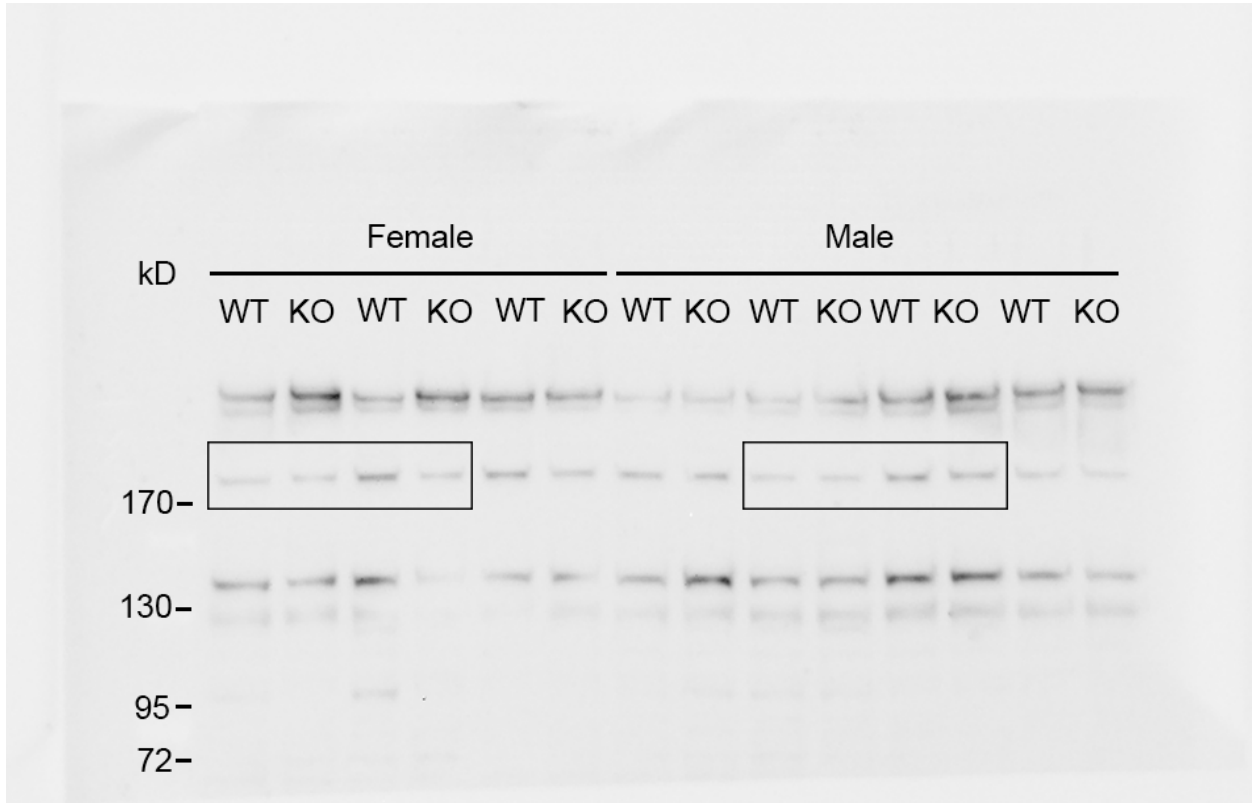





**Full unedited gel for Figure6G Anti-Dlg2**

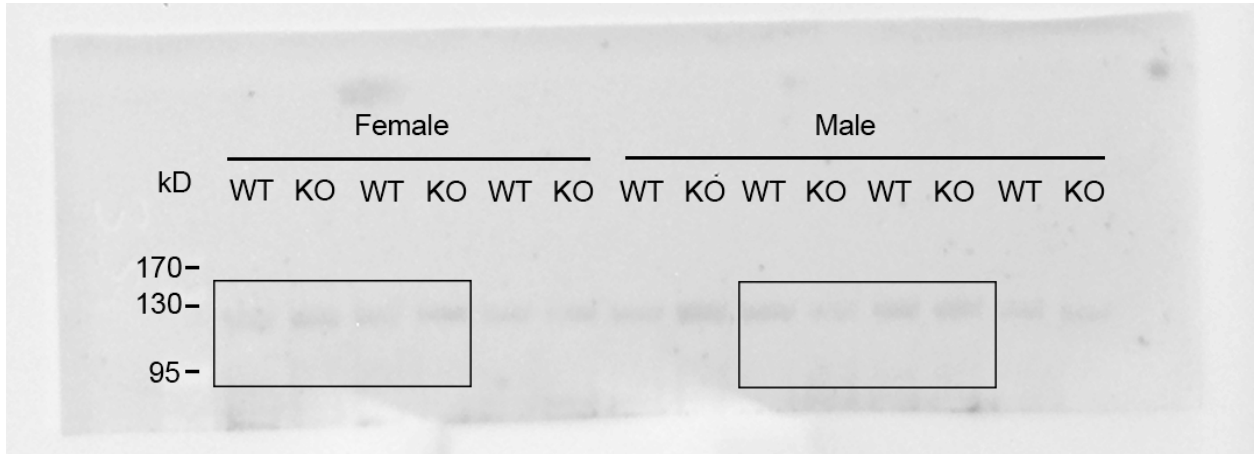

**Full unedited gel for Figure6G Anti-Ntsr2**

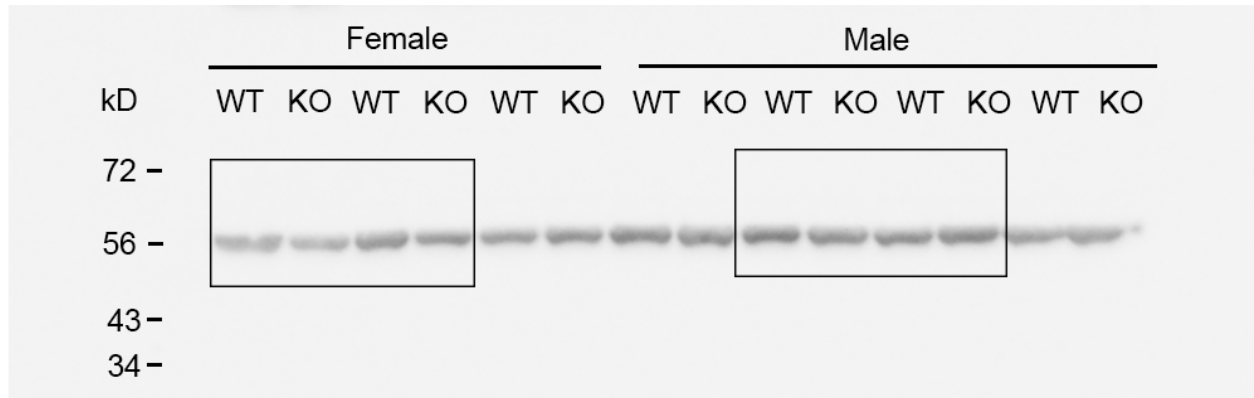

Supplement: sd10 [file 10]
